# Supplementary material for: Comparative Genomic Characterization of a Thailand–Myanmar Isolate, MS6, of Vibrio cholerae O1 El Tor, Which Is Phylogenetically Related to a “US Gulf Coast” Clone
Source: PubMed Central journal article supplement (PMC4045137; doi:10.1371/journal.pone.0098120), 2014-06-02

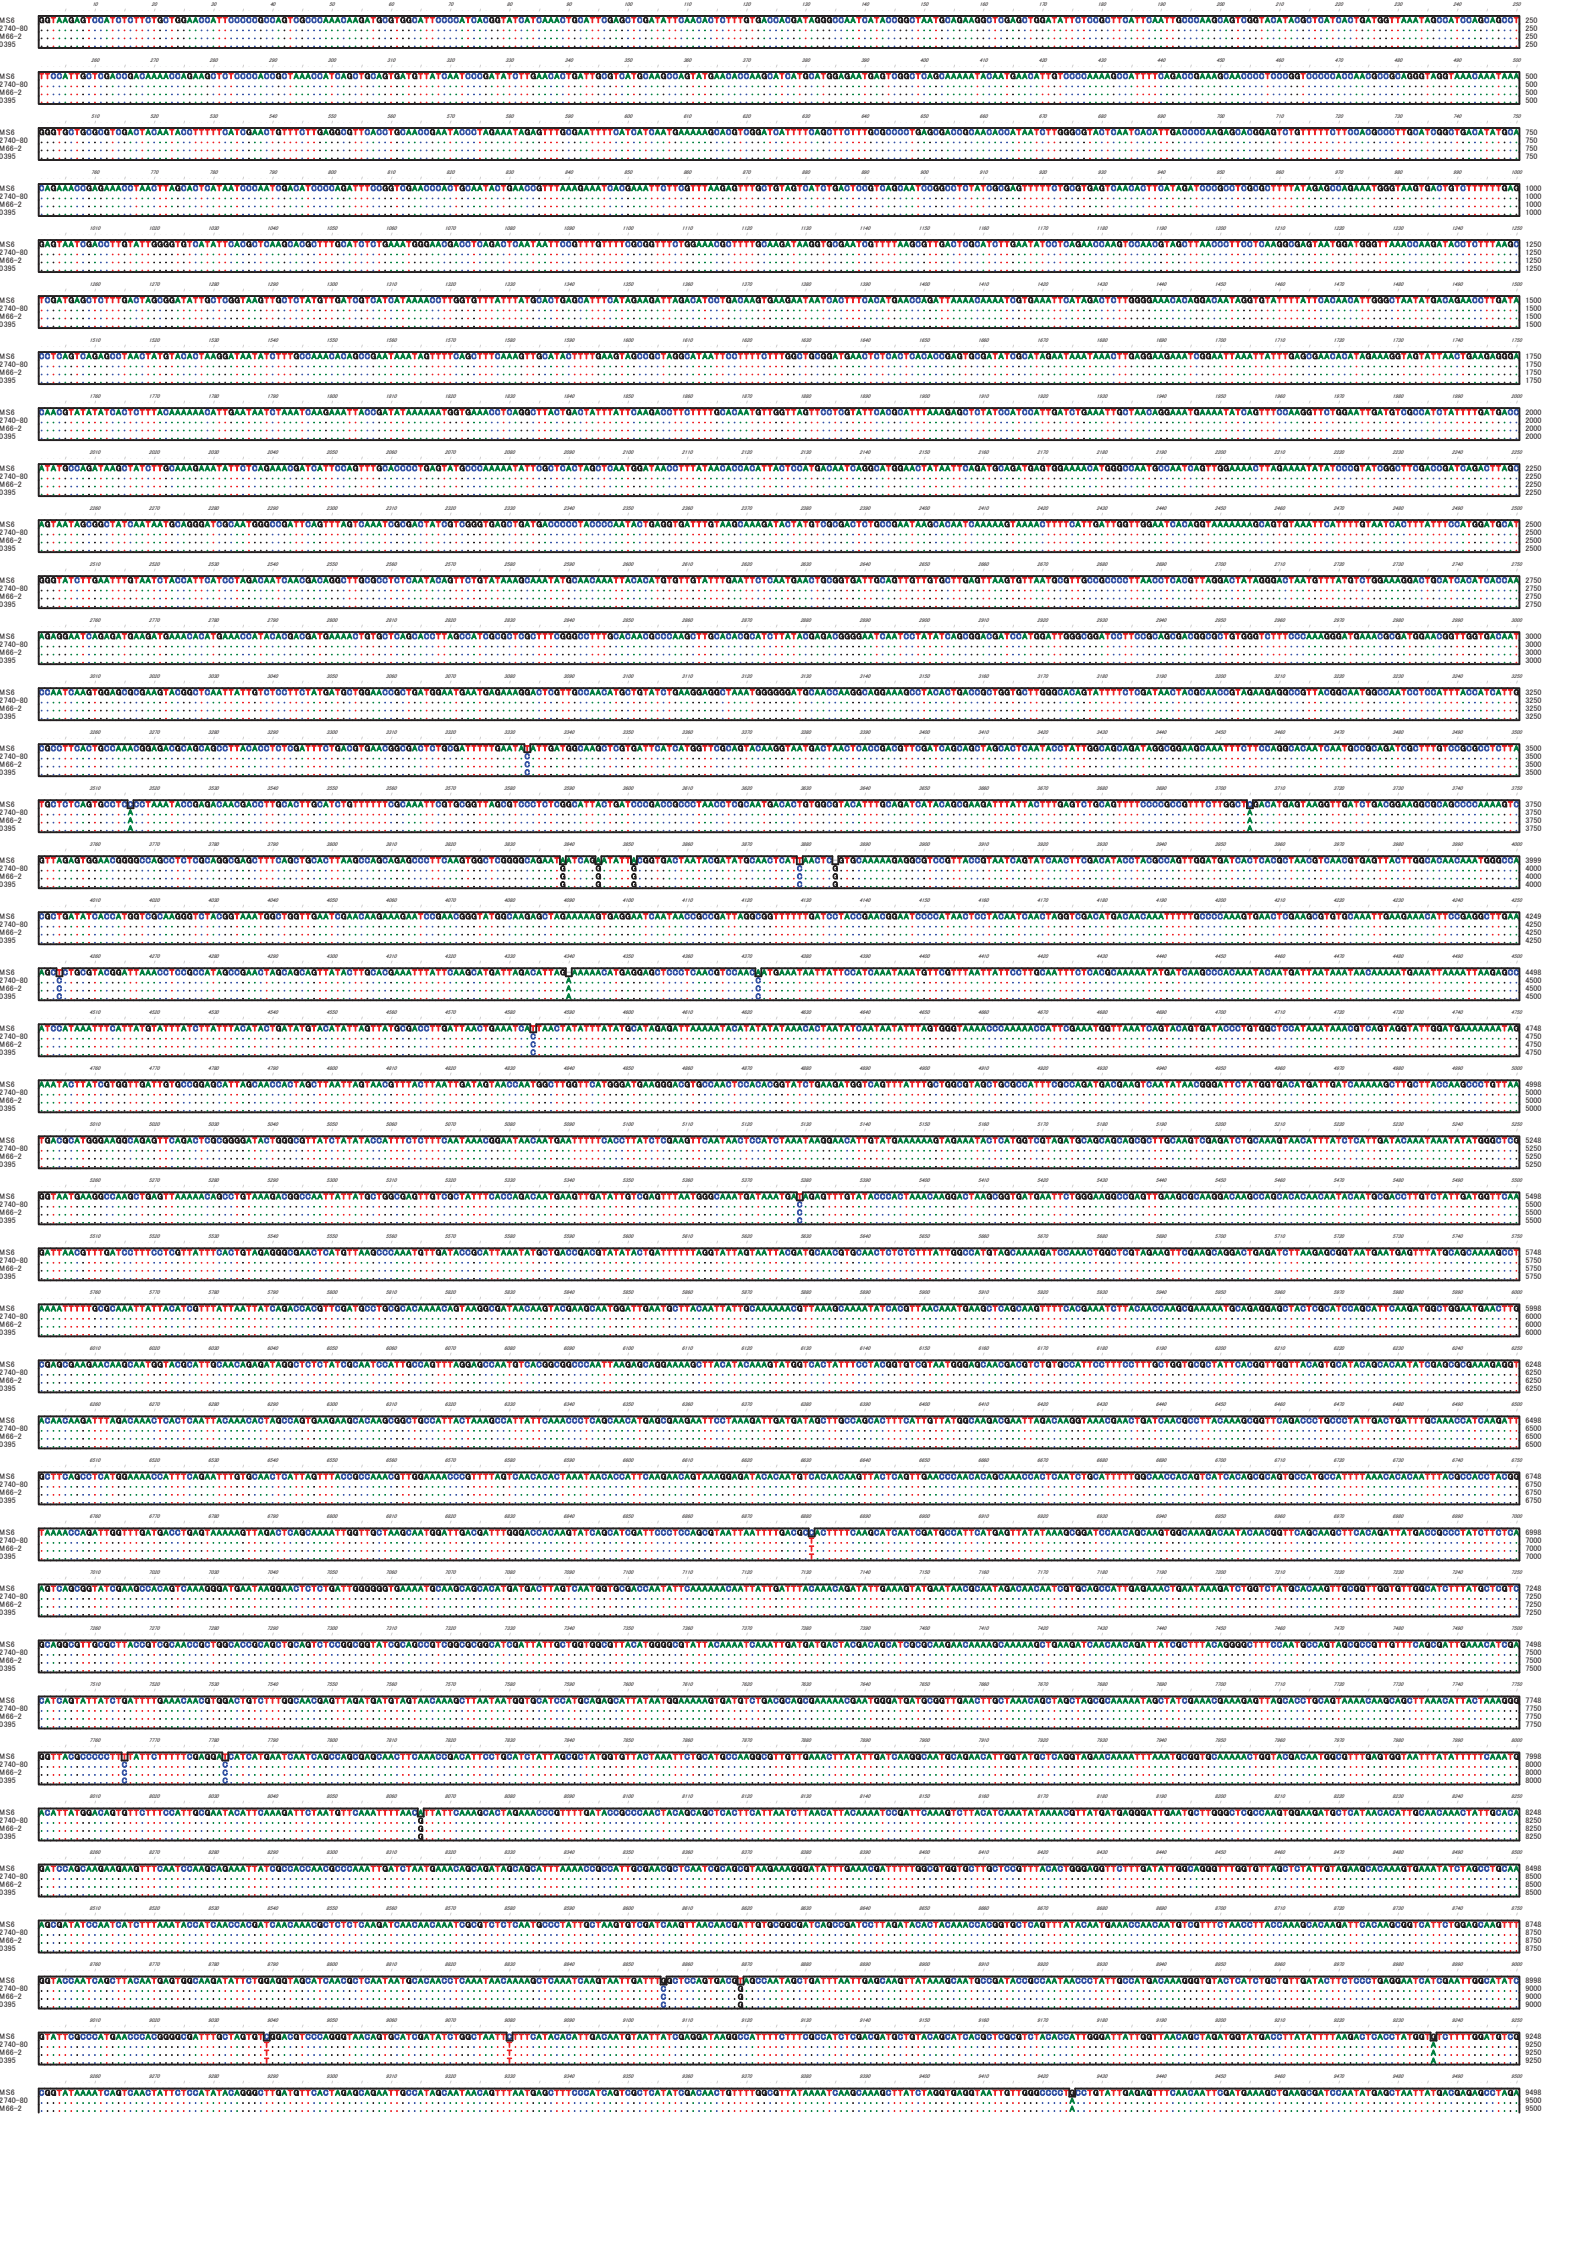

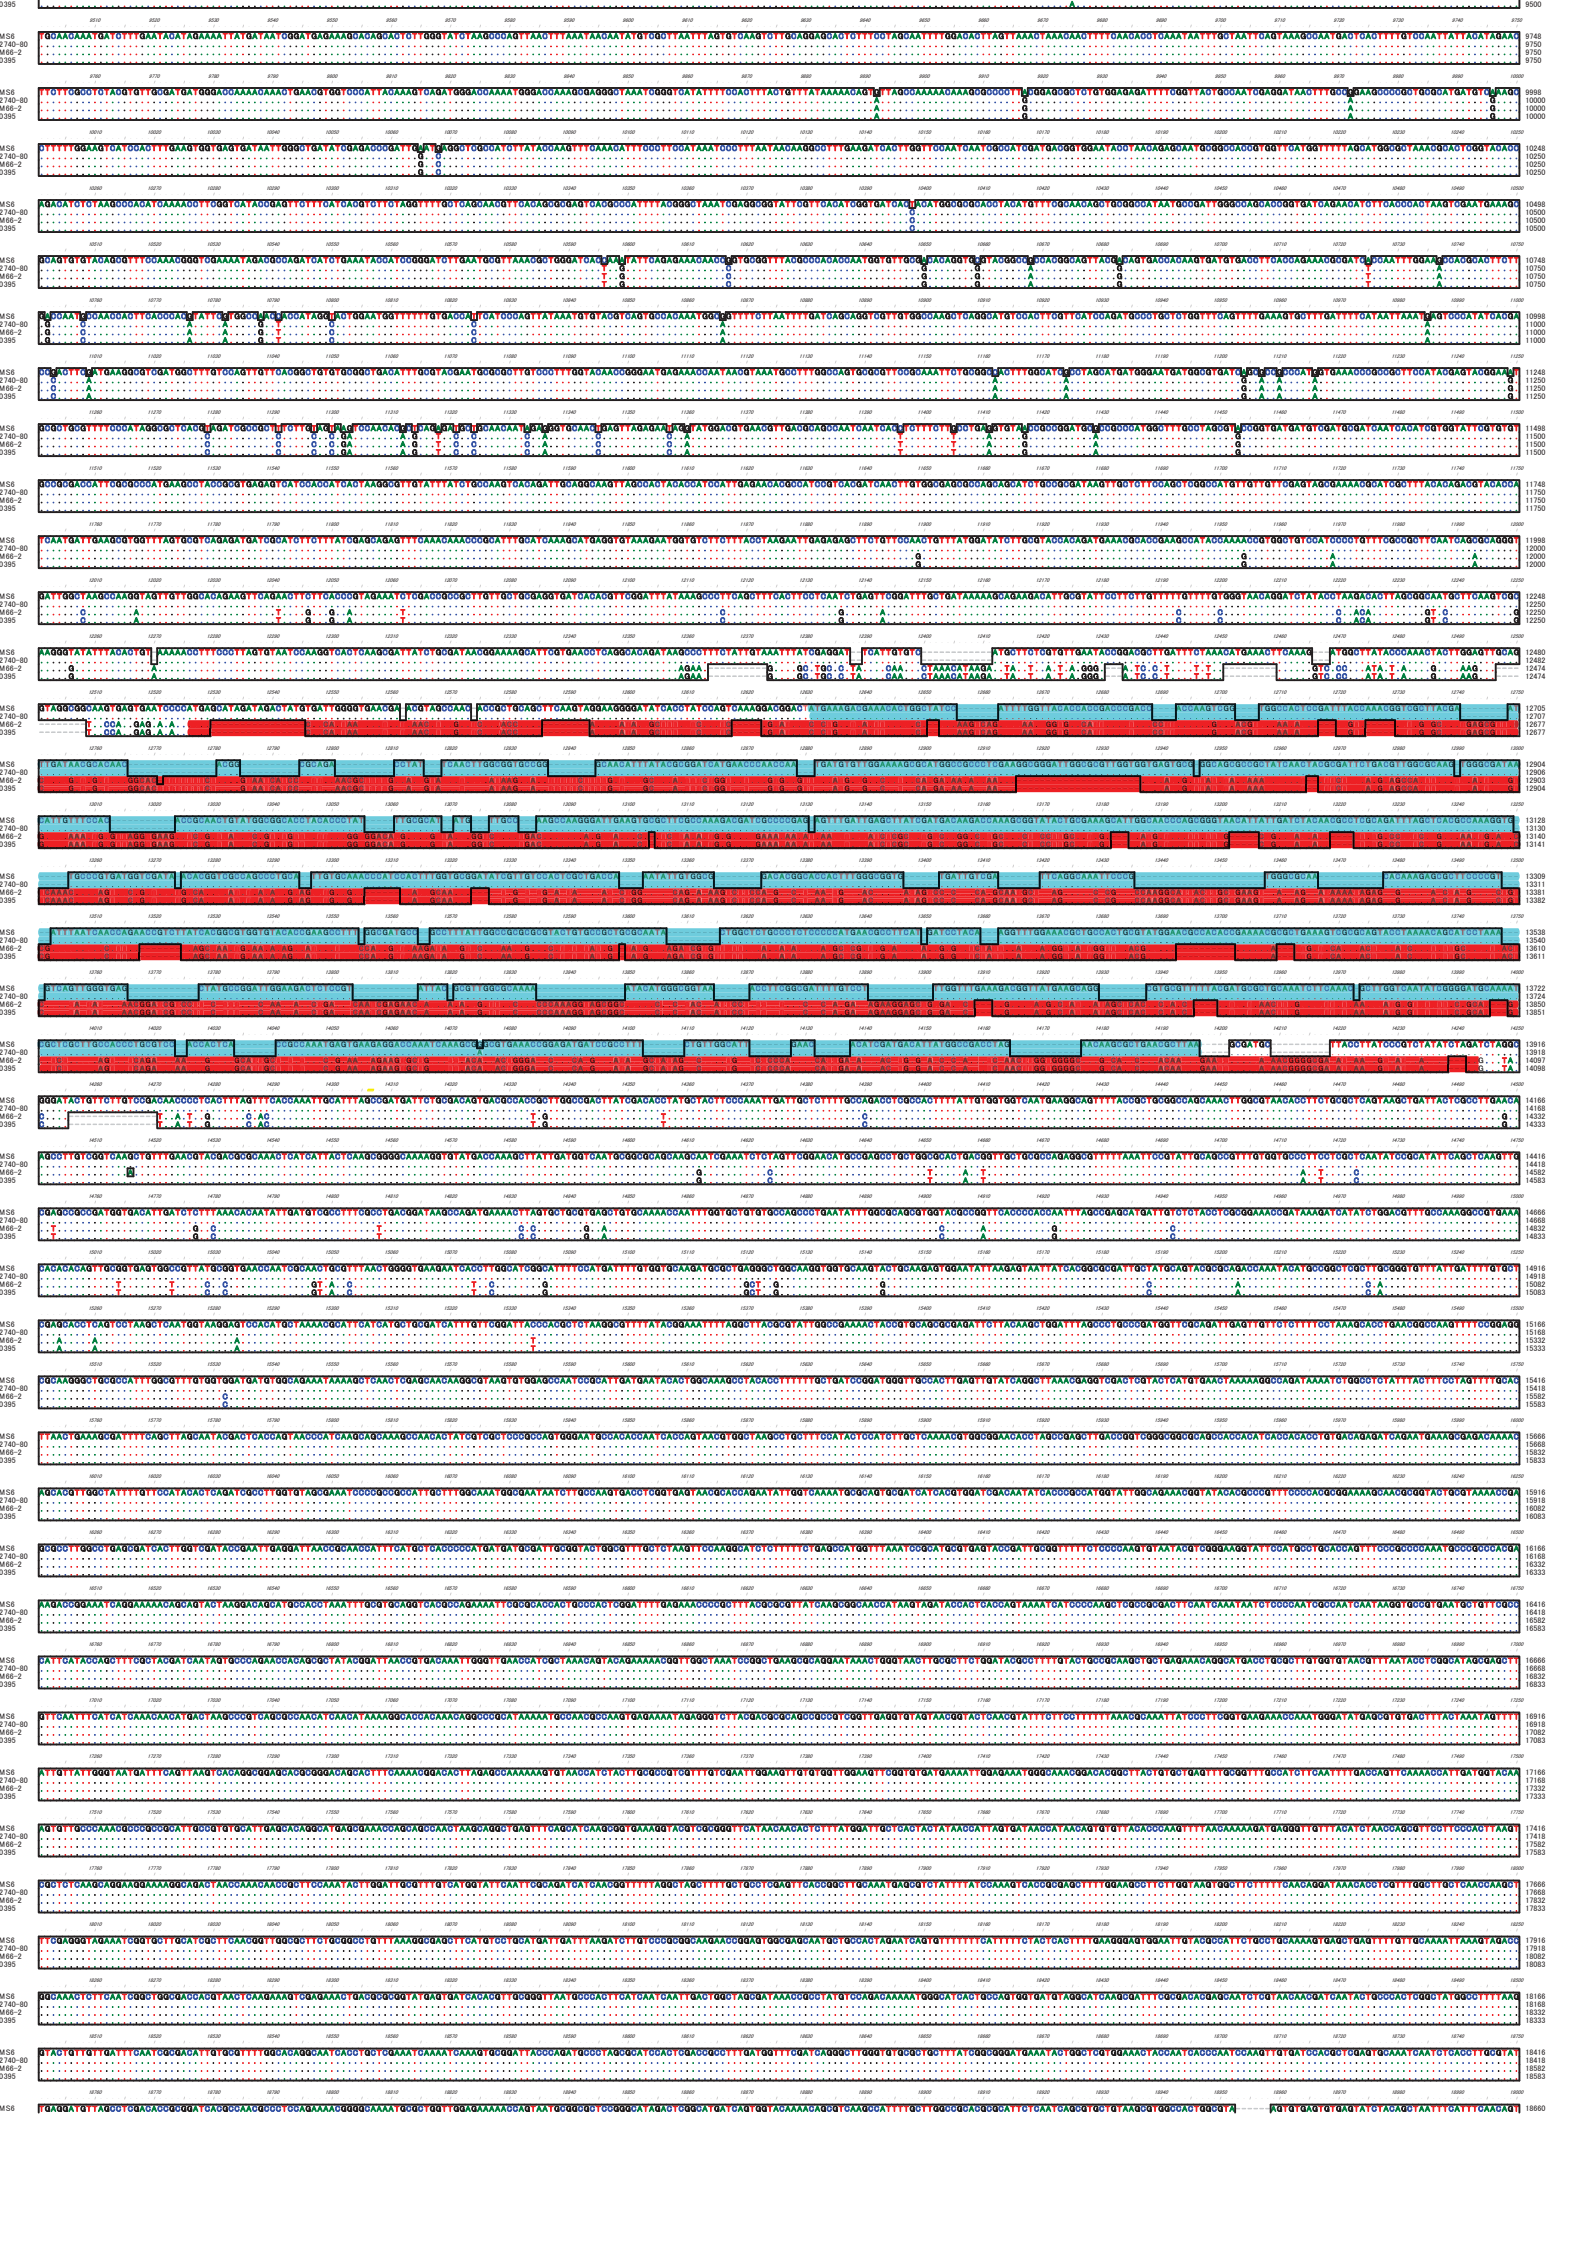

Supplement: pone.0098120.s006.pdf [file pone.0098120.s006.pdf]
